# Supplementary material for: SAS profile correlations reveal SAS hierarchical nature and information content
Source: PubMed Central journal article supplement (PMC5426712; doi:10.1371/journal.pone.0177309), 2017-05-11
Supplement: pone.0177309.s001.pdf [file pone.0177309.s001.pdf]

# S1 Text: Normal approximation to noncentral $\chi$ distributions

Yannick G. Spill and Michael Nilges

## 1 Noncentral univariate $\chi$

### 1.1 Derivation

Let  $\mathbf{X}_k$  be the a random vector with three coordinates. Per construction,  $\mathbf{X}_k \rightsquigarrow \mathcal{N}(\boldsymbol{\mu}_k, \mathbf{C}_k)$  where

$$\boldsymbol{\mu}_k \equiv \begin{pmatrix} x_k^\circ \\ y_k^\circ \\ z_k^\circ \end{pmatrix} \quad \mathbf{C}_k \equiv \begin{pmatrix} \tau_k^2 & 0 & 0 \\ 0 & \tau_k^2 & 0 \\ 0 & 0 & \tau_k^2 \end{pmatrix} \quad (1)$$

As a consequence,  $\mathbf{d}_{kl} \equiv \mathbf{X}_l - \mathbf{X}_k$  follows a normal distribution with mean  $\mathbf{d}_{kl}^\circ \equiv \boldsymbol{\mu}_l - \boldsymbol{\mu}_k$  and covariance matrix  $\mathbf{C}_k + \mathbf{C}_l$ . The Characteristic Function (CF) of the squared coordinates of  $\mathbf{d}_{kl}$  can then be computed easily. Let  $c$  be one of the three coordinates of  $\mathbf{d}_{kl}$ ,  $c^\circ$  its mean and  $\sigma^2$  its variance. Then

$$\mathbb{E} \left( e^{itc^2} \right) = \int_{\mathbb{R}} dc e^{itc^2} \frac{1}{\sqrt{2\pi\sigma}} e^{-\frac{1}{2\sigma^2}(c-c^\circ)^2} = \frac{1}{\sqrt{1-2it\sigma^2}} \exp \left( \frac{itc^{\circ 2}}{1-2it\sigma^2} \right) \quad (2)$$

We recognize the CF of a noncentral  $\chi^2$  distribution for the random variable  $c^2/\sigma^2$  with one degree of freedom ( $\nu = 1$ ) and noncentrality parameter  $\lambda = c^{\circ 2}/\sigma^2$ . The CF of a sum of random variables is their product, therefore  $|\mathbf{d}_{kl}|^2/(\tau_k^2 + \tau_l^2)$  follows a noncentral  $\chi^2$  distribution with  $\nu = 3$  degrees of freedom and noncentrality parameter  $\lambda = |\mathbf{d}_{kl}^\circ|^2/(\tau_k^2 + \tau_l^2)$ .

We just redemonstrated that the sum of the squares of three independent normal variables is a noncentral  $\chi^2$  distribution with three degrees of freedom. In this one-dimensional case, the Probability Density Function (PDF) is also known and can be obtained by an inverse fourier transform. After a change of variables, we finally have that  $\mathbf{d}_{kl} \equiv |\mathbf{d}_{kl}|$  has the following PDF

$$p_{\chi}(d_{kl}|d_{kl}^{\circ}, \tau_{kl}) = \frac{1}{\sqrt{2\pi\tau_{kl}}} \frac{d_{kl}}{d_{kl}^{\circ}} \left[ \exp\left(-\frac{(d_{kl} - d_{kl}^{\circ})^2}{2\tau_{kl}^2}\right) - \exp\left(-\frac{(d_{kl} + d_{kl}^{\circ})^2}{2\tau_{kl}^2}\right) \right] \quad (3)$$

where  $d_{kl}^{\circ} \equiv |d_{kl}^{\circ}|$  and  $\tau_{kl}^2 \equiv \tau_k^2 + \tau_l^2$ .

## 1.2 Approximation

We now seek a normal approximation to this distribution in the case where  $\tau_{kl} \ll d_{kl}^{\circ}$ . The mean and variance of the noncentral  $\chi$  distribution is

$$\mathbb{E}(d_{kl}) = d_{kl}^{\circ} + \frac{\tau_{kl}^2}{d_{kl}^{\circ}} \quad \mathbb{V}(d_{kl}) = \tau_{kl}^2 \quad (4)$$

Therefore

$$p_{\chi}(d_{kl}|d_{kl}^{\circ}, \tau_{kl}) \simeq p_{\mathcal{N}}\left(d_{kl}^{\circ} + \frac{\tau_{kl}^2}{d_{kl}^{\circ}}, \tau_{kl}^2\right)(d_{kl}) \quad (5)$$

We can extend the integration domain to  $\mathbb{R}$  since the probability mass on  $\mathbb{R}_-$  of the normal distribution is negligible when  $\tau_{kl} \ll d_{kl}^{\circ}$ .

## 2 Noncentral bivariate $\chi$

### 2.1 Attempted derivation

In an approach similar to section 1.1 (and with the same notations), we now seek the distribution of  $(d_{kl}, d_{kn})$ .  $d_{kl}$  and  $d_{kn}$  are correlated normal random variables. Let  $\mathbf{G}$  be the  $3 \times 2$  random normal matrix whose columns are  $d_{kl}$  and  $d_{kn}$ , and let  $\mathbf{v}_j^{\top}$  be the rows of  $\mathbf{G}$ . The  $\mathbf{v}_j$  are normally distributed, and in particular, have a covariance matrix  $\Sigma_{\star}$  independent of  $j$ , shown below. Then, by definition,

$$\mathbf{V} \equiv \sum_{j=1}^3 \mathbf{v}_j \mathbf{v}_j^{\top} = \begin{pmatrix} d_{kl}^2 & \mathbf{d}_{kl} \cdot \mathbf{d}_{kn} \\ \mathbf{d}_{kl} \cdot \mathbf{d}_{kn} & d_{kn}^2 \end{pmatrix} \quad (6)$$

has a noncentral Wishart distribution with three degrees of freedom, covariance matrix  $\Sigma_{\star}$  and noncentrality matrix  $\Lambda_{\star}$ <sup>1</sup>

$$\Sigma_{\star} \equiv \begin{pmatrix} \tau_{kl}^2 & \tau_k^2 \\ \tau_k^2 & \tau_{kn}^2 \end{pmatrix} \quad \Lambda_{\star} \equiv \begin{pmatrix} d_{kl}^{\circ 2} & d_{kl}^{\circ} d_{kn}^{\circ} \cos \theta \\ d_{kl}^{\circ} d_{kn}^{\circ} \cos \theta & d_{kn}^{\circ 2} \end{pmatrix} \quad (7)$$

where  $\cos \theta$  is the cosine of the angle between  $d_{kl}^{\circ}$  and  $d_{kn}^{\circ}$ . The PDF of the noncentral Wishart distribution has not been given explicitly in the general case. The case where

<sup>1</sup>Anderson and Girshick 1944; Anderson 1946; James 1955; Giri 2004, p. 231.

$\Lambda$  is of rank 2 is called the planar case, and an expression of its PDF has been given as a central Wishart distribution multiplied by an infinite series of Bessel functions.<sup>2</sup> Its CF, however, has a simpler form, and can be obtained by computing the expectation of  $e^{i\text{tr}(\mathbf{W}\mathbf{V})}$  under the normal distribution of the  $V_j$ .<sup>3</sup> For  $\nu$  degrees of freedom, covariance matrix  $\Sigma$  and noncentrality matrix  $\Lambda$ , it is

$$\Psi_{\nu, \Sigma, \Lambda}(\mathbf{W}) = \frac{\exp\left(\text{tr}\left[\mathbf{i}\mathbf{W}(\mathbb{1}_2 - 2\mathbf{i}\Sigma\mathbf{W})^{-1}\Lambda\right]\right)}{\det^{\nu/2}(\mathbb{1}_2 - 2\mathbf{i}\Sigma\mathbf{W})} \quad (8)$$

The marginal of a distribution can be computed instantly with the CF, it is in fact sufficient to set the corresponding entries of the  $\mathbf{W}$  matrix to zero. Therefore, the CF of the noncentral  $\chi^2$  distribution, which is the distribution of the diagonal elements of  $\mathbf{V}$ , is the same as that of the noncentral Wishart distribution provided we use a diagonal  $\mathbf{W}$  matrix. We did not find it possible to express the CF or PDF of  $(d_{kl}, d_{kn})$  from the CF of their squares. As we now show, this expression is however not necessary in our case.

## 2.2 Approximation

We seek an approximation PDF  $p$  to the noncentral bivariate  $\chi$  distribution (PDF  $p_\chi$ , which could not be expressed), that reduces to the univariate approximation by marginalization

$$\int p(d_{kl}, d_{kn}) dd_{kl} = p_{\mathcal{N}\left(d_{kl}^{\circ} + \frac{\tau_{kl}^2}{d_{kl}^{\circ}}, \tau_{kl}^2\right)}(d_{kl}) \quad (9)$$

The following form

$$p(d_{kl}, d_{kn}) \equiv p_{\mathcal{N}(\mathbf{d}', \Sigma_\rho)}(d_{kl}, d_{kn}) \quad \mathbf{d}' \equiv \begin{pmatrix} d_{kl}^{\circ} + \frac{\tau_{kl}^2}{d_{kl}^{\circ}} \\ d_{kn}^{\circ} + \frac{\tau_{kn}^2}{d_{kn}^{\circ}} \end{pmatrix} \quad \Sigma_\rho \equiv \begin{pmatrix} \tau_{kl}^2 & \rho\tau_k^2 \\ \rho\tau_k^2 & \tau_{kn}^2 \end{pmatrix} \quad (10)$$

satisfies this constraint. We just need to find a suitable value for  $\rho$ . For that purpose, we compare the exact CF of  $(d_{kl}^2, d_{kn}^2)$  to their approximate one. The exact CF was derived in the previous section, and was shown to be equation 8 with  $\nu = 3$ ,  $\Sigma = \Sigma_*$  and  $\Lambda = \Lambda_*$ . Because the coefficient-wise square of a bivariate normal deviate is a noncentral bivariate  $\chi^2$  distribution with one degree of freedom, the CF of the approximation is equation 8 with  $\nu = 1$ ,  $\Sigma = \Sigma_\rho$  and  $\Lambda = \Lambda_0 \equiv \mathbf{d}'\mathbf{d}'^\top$ .

Similar to the previous section, we seek to match the moments of this approximation to those of the true distribution. The mean of both distributions are

<sup>2</sup>Anderson and Girshick 1944.

<sup>3</sup>Tourneret, Ferrari, and Letac 2005.

$$\mathbb{E}_p(\mathbf{d}) = \frac{1}{i} \Psi'_p(0) = \text{diag}[\boldsymbol{\Lambda}_0 + \boldsymbol{\Sigma}_\rho] \quad \mathbb{E}_{\chi^2}(\mathbf{d}) = \frac{1}{i} \Psi'_{\boldsymbol{\Lambda}_*, \boldsymbol{\Sigma}_*}(0) = \text{diag}[\boldsymbol{\Lambda}_* + 3\boldsymbol{\Sigma}_*] \quad (11)$$

The difference of these moments does not depend on  $\rho$  and is zero to second order in  $\tau/d^\circ$ . Since  $\rho$  arises in the covariance matrix of the candidate distribution, it can be expected that the condition on  $\rho$  will come from equating the variances of both distributions. These variances are

$$\mathbb{V}_p(\mathbf{d}) = 2\boldsymbol{\Sigma}_\rho \circ (2\boldsymbol{\Lambda}_0 + \boldsymbol{\Sigma}_\rho) \quad \mathbb{V}_{\chi^2}(\mathbf{d}) = 2\boldsymbol{\Sigma}_* \circ (2\boldsymbol{\Lambda}_* + 3\boldsymbol{\Sigma}_*) \quad (12)$$

where  $\circ$  is the coefficient-wise product. The diagonal terms of the difference of these matrices does not depend on  $\rho$  and is zero to second order in  $\tau/d^\circ$ , like previously. The outer-diagonal term of the difference is, to second order in  $\tau/d^\circ$ , equal to

$$2\tau_{kl}^2 d_{kl}^\circ d_{kn}^\circ (\cos \theta - \rho) \quad (13)$$

This term, equated to zero, leads to the unique solution

$$\rho = \cos \theta \quad (14)$$

In conclusion, the probability density function

$$p(\mathbf{d}_{kl}, \mathbf{d}_{kn}) \equiv p_{\mathcal{N}(\mathbf{d}', \boldsymbol{\Sigma}_\rho)}(\mathbf{d}_{kl}, \mathbf{d}_{kn}) \quad (15)$$

$$\mathbf{d}' \equiv \begin{pmatrix} d_{kl}^\circ + \frac{\tau_{kl}^2}{d_{kl}^\circ} \\ d_{kn}^\circ + \frac{\tau_{kn}^2}{d_{kn}^\circ} \end{pmatrix} \quad \boldsymbol{\Sigma}_\rho \equiv \begin{pmatrix} \tau_{kl}^2 & \rho\tau_k^2 \\ \rho\tau_k^2 & \tau_{kn}^2 \end{pmatrix} \quad \rho = \cos \theta \quad (16)$$

approximates that of the noncentral bivariate  $\chi$  distribution with three degrees of freedom for large distances with respect to  $\tau$ . This approximation matches the first two moments of the true distribution to second order in  $\tau/d^\circ$ .

## References

- Anderson, T. W. (1946). "The Non-Central Wishart Distribution and Certain Problems of Multivariate Statistics". English. In: *Ann. Math. Stat.* 17.4, pp. 409–431 (cit. on p. 2).
- Anderson, T. W. and M. A. Girshick (1944). "Some Extensions of the Wishart Distribution". English. In: *Ann. Math. Stat.* 15.4, pp. 345–357 (cit. on pp. 2, 3).
- Giri, Narayan C. (2004). *Multivariate statistical analysis*. Vol. 171. CRC Press (cit. on p. 2).

- James, A. T. (1955). "The Non-Central Wishart Distribution". In: *Proceedings of the Royal Society of London*. Vol. 229. Series A, Mathematical and Physical Sciences. The Royal Society, pp. 364–366 (cit. on p. 2).
- Tourneret, J.-Y., A. Ferrari, and G. Letac (2005). "The noncentral wishart distribution: properties and application to speckle imaging". In: *IEEE/SP 13th Workshop on Statistical Signal Processing*, pp. 924–929. DOI: [10.1109/SSP.2005.1628726](https://doi.org/10.1109/SSP.2005.1628726) (cit. on p. 3).
