# Supplementary material for: SAS profile correlations reveal SAS hierarchical nature and information content
Source: PubMed Central journal article supplement (PMC5426712; doi:10.1371/journal.pone.0177309), 2017-05-11
Supplement: pone.0177309.s004.pdf [file pone.0177309.s004.pdf]

# S4 Text: Lysozyme MD simulations

Yannick G. Spill and Michael Nilges

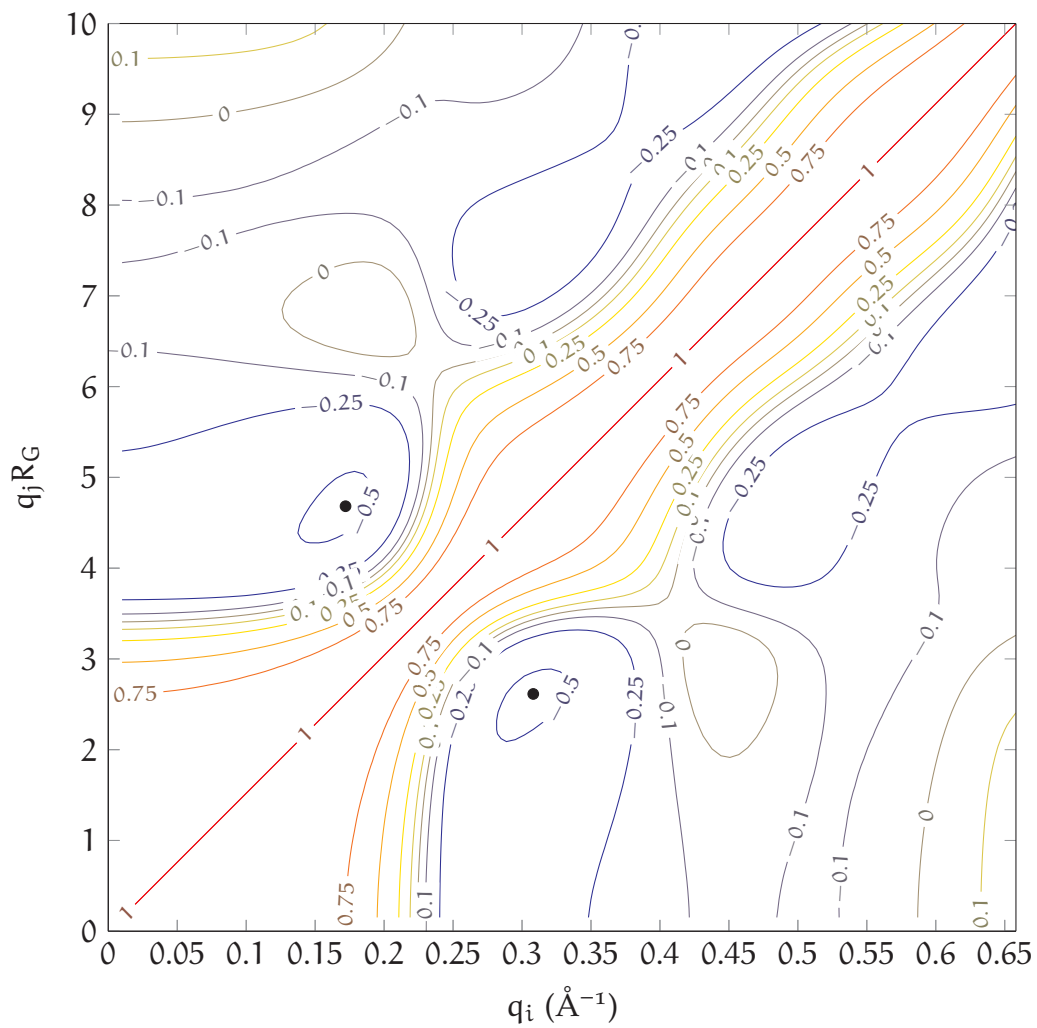

Figure 1: Lysozyme SAS profile numerical correlations using MD (see text).  $R_G = 15.2 \text{ \AA}$ . Smallest correlation is  $-0.53$  and is indicated by a blue dot.

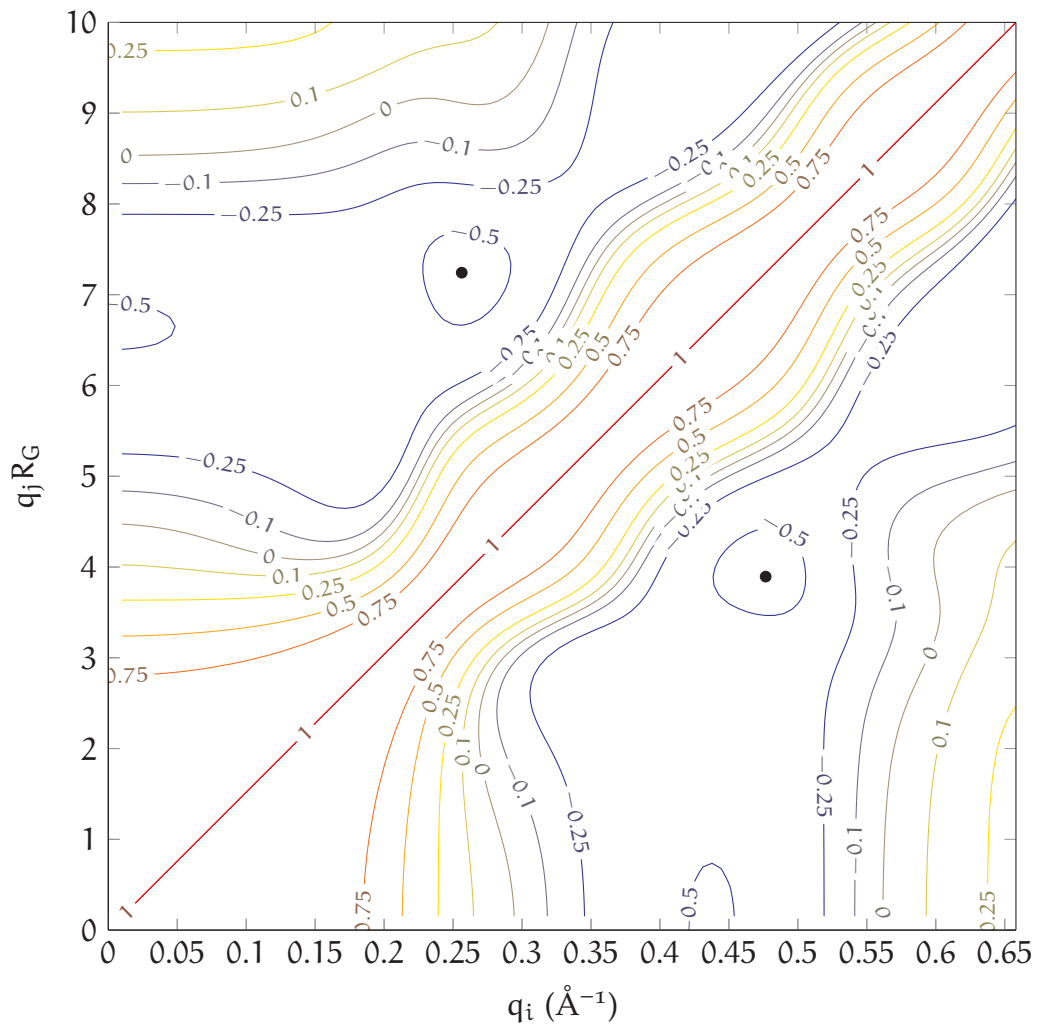

Figure 2: Lysozyme SAS profile numerical correlations using second lysozyme simulation.  $R_G = 15.2 \text{ \AA}$ . Smallest correlation is  $-0.58$  and is indicated by a blue dot.

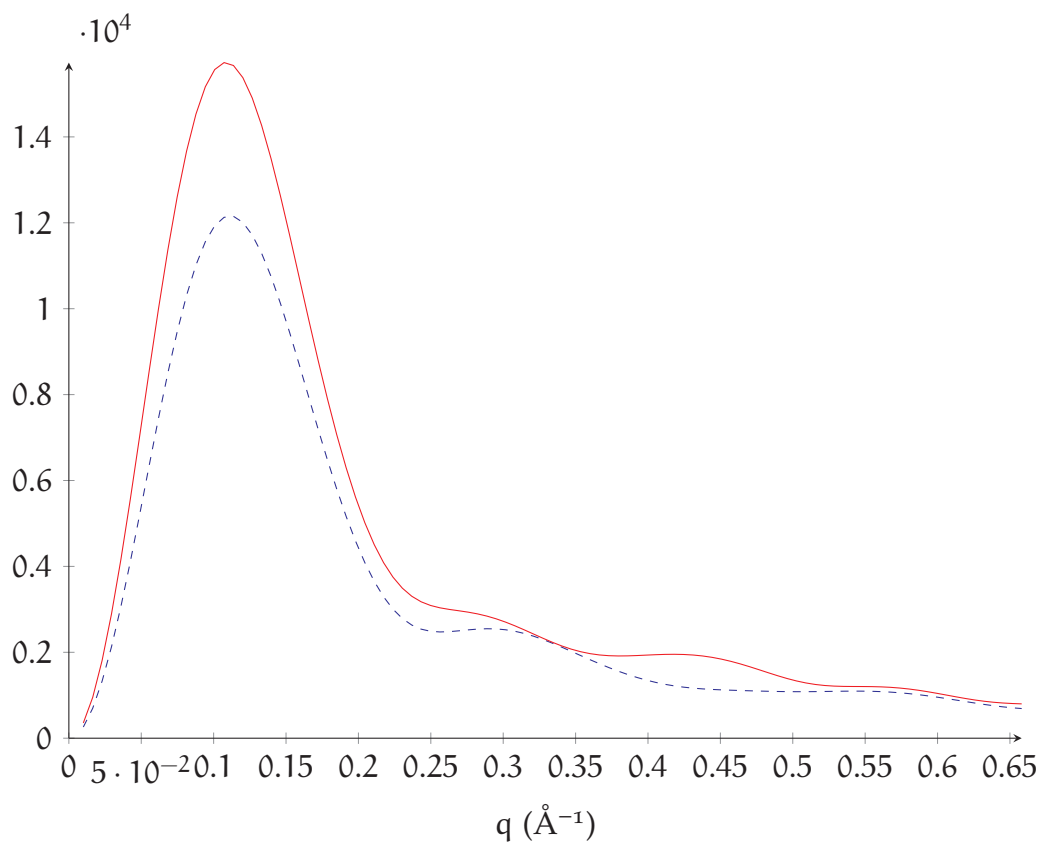

Figure 3: Lysozyme standard deviation from first (blue dashes) and second MD simulation (red solid line)
