# Supplementary material for: SAS profile correlations reveal SAS hierarchical nature and information content
Source: PubMed Central journal article supplement (PMC5426712; doi:10.1371/journal.pone.0177309), 2017-05-11
Supplement: pone.0177309.s005.pdf [file pone.0177309.s005.pdf]

# S5 Text: p15PAF

Yannick G. Spill and Michael Nilges

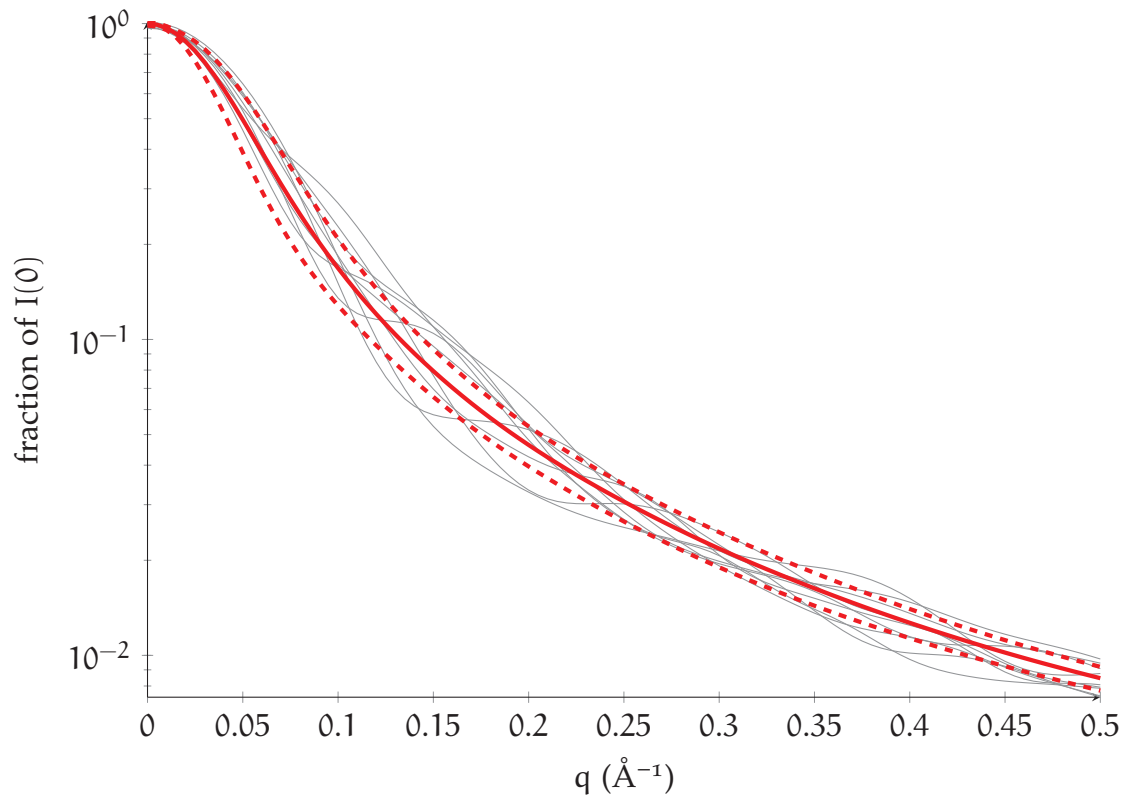

Figure 1: Ensemble average SAS profile (solid red), 68% ( $1\sigma$ ) confidence interval (dashed red) and 9 example SAS profiles (grey) of p15PAF protein ensemble<sup>1</sup> (PED code PED6AAA). The deposited ensemble contains 4939 structures. Individual SAXS profiles were calculated using FoXS with  $c1 = 1$  and  $c2 = 0.68$ .

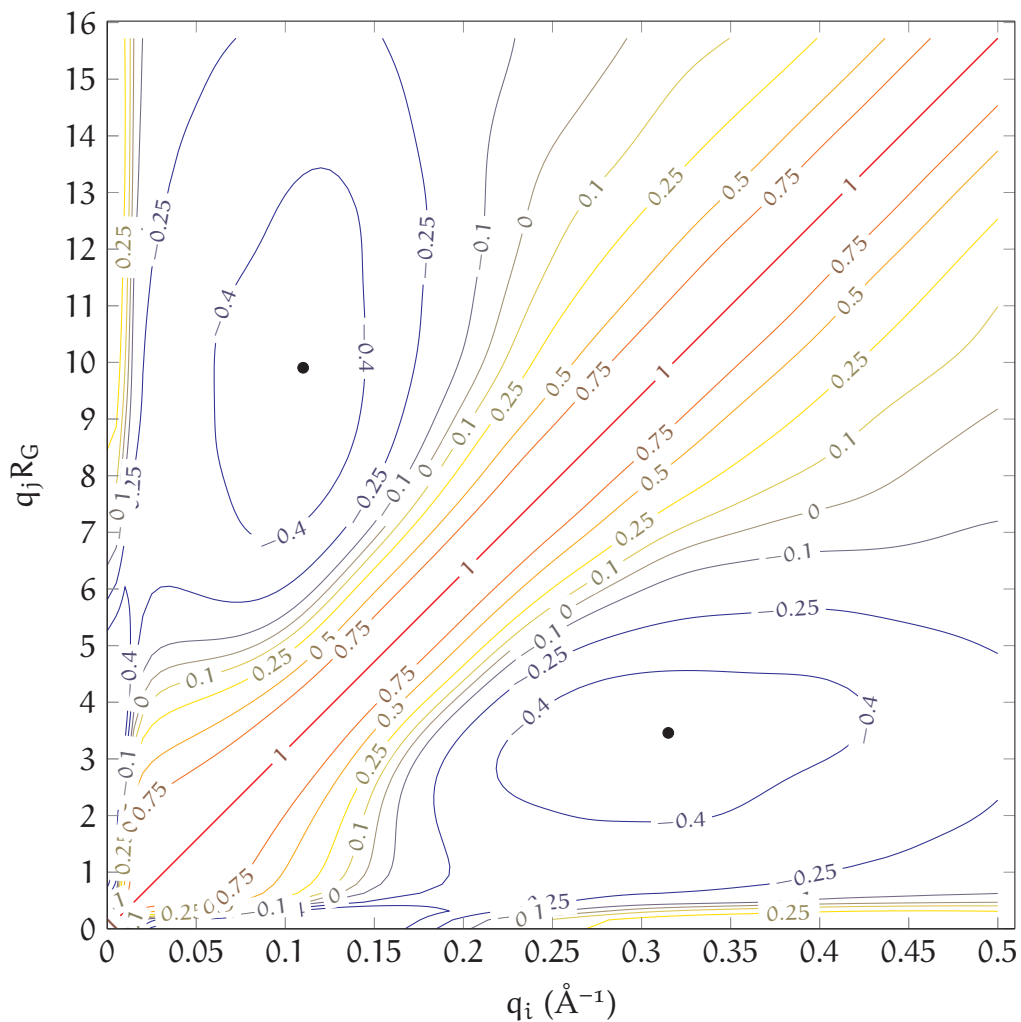

Figure 2: p15PAF SAS profile numerical correlations using ensemble deposited on PED (code PED6AAA, see text).<sup>2</sup>  $R_G = 31.4 \text{ \AA}$ . Smallest correlation is  $-0.47$  and is indicated by a blue dot. The deposited ensemble contains 4939 structures. Individual SAXS profiles were calculated using FoXS with  $c1 = 1$  and  $c2 = 0.68$ .

## References

De Biasio, A, A Ibañez de Opakua, T N Cordeiro, M Villate, N Merino, N Sibille, M Lelli, T Diercks, P Bernadó, and F J Blanco (2014). “p15PAF is an intrinsically disordered protein with nonrandom structural preferences at sites of interaction with other proteins”. In: *Biophys. J.* 106.4, pp. 865–874. DOI: [10.1016/j.bpj.2013.12.046](https://doi.org/10.1016/j.bpj.2013.12.046).
